1 **BED-domain containing immune receptors confer**  
2 **diverse resistance spectra to yellow rust**

3

4 Clemence Marchal<sup>1\*</sup>, Jianping Zhang<sup>2,3\*</sup>, Peng Zhang<sup>4</sup>, Paul Fenwick<sup>5</sup>, Burkhard  
5 Steuernagel<sup>1</sup>, Nikolai M. Adamski<sup>1</sup>, Lesley Boyd<sup>6</sup>, Robert McIntosh<sup>4</sup>, Brande B.H. Wulff<sup>1</sup>,  
6 Simon Berry<sup>5</sup>, Evans Lagudah<sup>2</sup>, Cristobal Uauy<sup>1 †</sup>

7

8

9 <sup>1</sup> John Innes Centre, Norwich Research Park, Norwich NR4 7UH, United Kingdom

10 <sup>2</sup> Commonwealth Scientific and Industrial Research Organization (CSIRO) Agriculture &  
11 Food, Canberra, ACT 2601, Australia

12 <sup>3</sup> Henan Tianmin Seed Company Limited, Lankao County, 475300, Henan Province, China

13 <sup>4</sup> University of Sydney, Plant Breeding Institute, Cobbitty, NSW 2570, Australia

14 <sup>5</sup> Limagrain UK Ltd, Rothwell, Market Rasen, Lincolnshire, LN7 6DT, United Kingdom

15 <sup>6</sup> NIAB, Huntingdon Road, Cambridge, CB3 0LE, United Kingdom

16

17 \*Clemence Marchal and Jianping Zhang contributed equally to this work

18 † Correspondence to [cristobal.uauy@jic.ac.uk](mailto:cristobal.uauy@jic.ac.uk)

## 19 **Introductory paragraph**

20 Crop diseases reduce wheat yields by ~25% globally and thus pose a major threat to global  
21 food security<sup>1</sup>. Genetic resistance can reduce crop losses in the field and can be selected for  
22 through the use of molecular markers. However, genetic resistance often breaks down  
23 following changes in pathogen virulence, as experienced with the wheat yellow (stripe) rust  
24 fungus *Puccinia striiformis* f. sp. *tritici* (*Pst*)<sup>2</sup>. This highlights the need to (i) identify genes  
25 that alone or in combination provide broad-spectrum resistance and (ii) increase our  
26 understanding of the underlying molecular modes of action. Here we report the isolation and  
27 characterisation of three major yellow rust resistance genes (*Yr7*, *Yr5*, and *YrSP*) from  
28 hexaploid wheat (*Triticum aestivum*), each having a distinct and unique recognition  
29 specificity. We show that *Yr5*, which remains effective to a broad range of *Pst* isolates  
30 worldwide, is allelic to *YrSP* and paralogous to *Yr7*, both of which have been overcome by  
31 multiple *Pst* isolates. All three *Yr* genes belong to a complex resistance gene cluster on  
32 chromosome 2B encoding nucleotide-binding and leucine-rich repeat proteins (NLRs) with a  
33 non-canonical N-terminal zinc-finger BED domain<sup>3</sup> that is distinct from those found in non-  
34 NLR wheat proteins. We developed diagnostic markers to accelerate haplotype analysis and  
35 for marker-assisted selection to enable the stacking of the non-allelic *Yr* genes. Our results  
36 provide evidence that the BED-NLR gene architecture can provide effective field-based  
37 resistance to important fungal diseases such as wheat yellow rust.

38

## 39 **Main**

40 In plant immunity, NLRs act as intracellular immune receptors that upon pathogen  
41 recognition trigger a series of signalling steps that ultimately lead to cell death, thus  
42 preventing the spread of infection<sup>4,5</sup>. The NB-ARC domain is the hallmark of NLRs which in  
43 most cases include leucine-rich repeats (LRRs) at the C-terminus. Recent *in silico* analyses

44 have identified NLRs with additional ‘integrated’ domains<sup>6-8</sup>, including zinc-finger BED  
45 domains (BED-NLRs). The BED domain function within BED-NLRs is unknown, although  
46 the BED domain from the non-NLR DAYSLEEPER protein was shown to bind DNA in  
47 *Arabidopsis*<sup>9</sup>. BED-NLRs are widespread across Angiosperm genomes<sup>6-8</sup> and this gene  
48 architecture has been shown to confer resistance to bacterial blast in rice (*XaI*<sup>10,11</sup>).

49

50 The genetic relationship between *Yr5* and *Yr7* has been debated for almost 45 years<sup>12,13</sup>. Both  
51 genes map to chromosome arm 2BL in hexaploid wheat and were hypothesized to be  
52 allelic<sup>14</sup>, and closely linked with *YrSP*<sup>15</sup>. Whilst only one of >6,000 tested *Pst* isolates  
53 worldwide has been found virulent to *Yr5* (Supplementary Table 1<sup>14,16</sup>), both *Yr7* and *YrSP*  
54 have been overcome in the field. For *Yr7*, this is likely due to its wide deployment in cultivars  
55 (Supplementary Table 2, Supplementary Figure 1). This highlights the importance of  
56 stewardship plans (including diagnostic markers) to deploy *Yr5* in combination with other  
57 genes as currently done in the US (e.g. *Yr5+Yr15*; UC Davis breeding programme).

58

59 To clone the genes encoding *Yr7*, *Yr5*, and *YrSP*, we identified susceptible ethyl  
60 methanesulfonate-derived (EMS) mutants from different genetic backgrounds carrying these  
61 genes (Figure 1, Supplementary Tables 3-4). We performed MutRenSeq<sup>17</sup> and isolated a  
62 single candidate contig for each of the three genes based on nine, ten, and four independent  
63 susceptible mutants, respectively (Figure 1a; Supplementary Figure 2). The three candidate  
64 contigs were genetically linked to a common mapping interval, previously identified for the  
65 three *Yr* loci<sup>15,18,19</sup>. Their closest homologs in the Chinese Spring wheat genome sequence  
66 (RefSeq v1.0) all lie within this common genetic interval (Figure 1b; Supplementary Figure  
67 3).

68

69 Within each contig we predicted a single open reading frame based on RNA-Seq data. All  
70 three predicted *Yr* genes displayed similar exon-intron structures (Figure 1a), although *YrSP*  
71 was truncated in exon 3 due to a single base deletion that resulted in a premature termination  
72 codon. The DNA sequences of *Yr7* and *Yr5* were 77.9% identical across the complete gene;  
73 whereas *YrSP* was a truncated version of *Yr5*, sharing 99.8% identity in the common  
74 sequence (Supplementary Files 1 and 2). This suggests that *Yr5* and *YrSP* are encoded by  
75 alleles of the same gene, but are paralogous to *Yr7*. The 23 mutations identified by  
76 MutRenSeq were confirmed by Sanger sequencing and all lead to either an amino acid  
77 substitution or a truncation allele (splice junction or termination codon) (Figure 1a;  
78 Supplementary Table 4). Taken together, the mutant and genetic analyses demonstrate that  
79 *Yr5* and *YrSP* are allelic, while *Yr7* is encoded by a related, yet distinct gene.

80

81 The *Yr7*, *Yr5*, and *YrSP* proteins contain a zinc-finger BED domain at the N-terminus,  
82 followed by the canonical NB-ARC domain. Unlike previously cloned resistance genes in  
83 grasses (e.g. *Mla10l*<sup>20</sup>, *Sr33*<sup>21</sup>, *Pm3*<sup>22</sup>), neither *Yr7* nor *Yr5/YrSP* encode Coiled Coil domains  
84 at the N-terminus (Supplementary Figure 4). Only *Yr7* and *Yr5* proteins encode multiple  
85 LRR motifs at the C-terminus (Figure 2a; green bars), *YrSP* having lost most of the LRR  
86 region due to the presence of the premature termination codon in exon 3. *YrSP* still confers  
87 functional resistance to *Pst*, although with a different recognition specificity to *Yr5*. *Yr7* and  
88 *Yr5/YrSP* are highly conserved in the N-terminus, with a single amino-acid change in the  
89 BED domain. This high degree of conservation is eroded downstream of the BED domain  
90 (Figure 2a). The BED domain is required for *Yr7*-mediated resistance, as a single amino acid  
91 change in mutant line Cad0903 led to a susceptible reaction (Figure 1a). However,  
92 recognition specificity is not solely governed by the BED domain, as the *Yr5* and *YrSP* alleles  
93 have identical BED domain sequences, yet confer resistance to different *Pst* isolates. The

94 highly conserved Yr7 and Yr5/YrSP BED domains could function in a similar way to the  
95 integrated WKRY domain in the *Arabidopsis* RRS1-R immune receptor which binds  
96 unrelated bacterial effectors yet activates defense response through mechanisms involving  
97 other regions of the protein<sup>23</sup>.

98

99 We examined the allelic variation in *Yr7*, *Yr5*, and *YrSP* across eight sequenced tetraploid  
100 and hexaploid wheat genomes (Supplementary Table 5). We identified *Yr7* only in Cadenza  
101 and Paragon, which are identical-by-descent in this interval (Supplementary File 3,  
102 Supplementary Table 6, and Supplementary Figure 5). Both cultivars are derived from the  
103 original source of *Yr7*, tetraploid durum wheat (*T. turgidum* ssp. *durum*) cultivar Iumillo and  
104 its hexaploid derivative Thatcher (Supplementary Figure 5). None of the three sequenced  
105 tetraploid accessions (Svevo, Kronos, Zavitan) carry *Yr7* (Supplementary Table 6).

106

107 For *Yr5/YrSP*, we identified three additional alleles in the sequenced hexaploid wheat  
108 cultivars (Figure 2b; Supplementary Table 7). Cultivar Claire encodes a complete NLR with  
109 six amino-acid changes, including one within the NB-ARC domain, and six polymorphisms  
110 in the C-terminus compared to *Yr5*. Cultivars Robigus, Paragon, and Cadenza also encode a  
111 full length NLR that shares common polymorphisms with Claire, in addition to 19 amino acid  
112 substitutions across the BED and NB-ARC domains. The C-terminus polymorphisms  
113 between *Yr5* and the other cultivars is due to a 774 bp insertion in *Yr5*, close to the 3' end,  
114 which carries an alternate termination codon (Supplementary File 2). Tetraploid cultivars  
115 Kronos and Svevo encode a fifth *Yr5/YrSP* allele with a truncation in the LRR region distinct  
116 from *YrSP*, in addition to multiple amino acid substitutions across the C-terminus  
117 (Supplementary Table 7). This truncated tetraploid allele is reminiscent of *YrSP* and is  
118 expressed in Kronos (see Methods). However, none of these cultivars (Claire, Robigus,

119 Paragon, Cadenza, Svevo, and Kronos) exhibit a *Yr5/YrSP* resistance response, suggesting  
120 that these amino acid changes and truncations may alter recognition specificity or protein  
121 function.

122

123 We designed diagnostic markers for *Yr7*, *Yr5*, and *YrSP* to facilitate their detection and use in  
124 breeding. We confirmed their presence in the donor cultivars Thatcher and Lee (*Yr7*),  
125 Spaldings Prolific (*YrSP*), and spelt wheat cv. Album (*Yr5*) (Supplementary Tables 8-9;  
126 Supplementary Figures 5-6). We tested *Yr7* and *YrSP* markers in a collection of global  
127 landraces<sup>24</sup> and European cultivars<sup>25</sup> released over the past one hundred years. *YrSP* was  
128 absent from the tested germplasm, except for AvocetS-*YrSP* (Supplementary Table 9). *Yr7* on  
129 the otherhand was more prevalent in the germplasm tested and we could track its presence  
130 across pedigrees, including Cadenza derived cultivars (Supplementary Tables 8-9;  
131 Supplementary Figure 5). We confirmed *Yr5* in the AvocetS-*Yr5* and Lemhi-*Yr5* lines and it  
132 was not detected in the other tested lines, consistent with the fact that *Yr5* has not yet been  
133 deployed within European breeding programmes (Supplementary Tables 10 and 17 and  
134 Supplementary Figure 6). The *Yr5* diagnostic marker will facilitate its deployment, hopefully  
135 within a breeding strategy that ensures its effectiveness long-term<sup>26</sup>.

136

137 We defined the *Yr7/Yr5/YrSP* syntenic interval across the wheat genomes and related grass  
138 species *Aegilops tauschii* (D genome progenitor), *Hordeum vulgare* (barley), *Brachypodium*  
139 *distachyon*, and *Oryza sativa* (rice) (Supplementary files 4 and 5, Supplementary Figure 7).

140 We identified both canonical NLRs, as well as BED-NLRs across all genomes and species,  
141 except for barley, which only contained canonical NLRs across the syntenic region. The  
142 phylogenetic relationship based on the NB-ARC domain suggests a common evolutionary  
143 origin of these integrated domain NLR proteins before the wheat-rice divergence (~50 Mya)

144 and an expansion in the number of NLRs in the A and B genomes of polyploid wheat species  
145 (Figure 3a; Supplementary Figure 8). Within the interval we also identified several genes in  
146 the A, B, and D genomes that encode two consecutive in-frame BED domains (named BED-I  
147 and BED\_II; Figure 3b-c, Supplementary Figure 7) followed by the canonical NLR. The  
148 BED domains in these genes were fully encoded within a single exon (exons 2 and 3) and in  
149 most cases had a four-exon structure (Figure 3c). This is consistent with the three-exon  
150 structure of single BED domain genes, such as *Yr7* and *Yr5/YrSP* (BED-I encoded on exon  
151 2). To our knowledge this is the first report of the double BED domain NLR protein  
152 structure. The biological function of this molecular innovation remains to be determined,  
153 although our data show that the single BED-I structure can confer *Pst* resistance and is  
154 required for *Yr7*-mediated resistance.

155

156 Among other mechanisms, integrated domains of NLRs are hypothesised to act as decoys for  
157 pathogen effector targets<sup>5</sup>. This would suggest that the integrated domain might be sequence-  
158 related to the host protein targeted by the effector. To identify these potential effector targets  
159 in the host, we retrieved all BED-domain proteins (108) from the hexaploid wheat genome,  
160 including 25 BED-NLRs, and additional BED-NLRs located in the syntenic intervals  
161 (Supplementary Table 11; Supplementary file 4). We also retrieved the rice *Xa1*<sup>10,11</sup> and  
162 ZBED proteins, the latter being hypothesized to mediate rice resistance to  
163 *Magnaporthe oryzae*<sup>7</sup>. We used the split network method implemented in SplitsTree4<sup>27</sup> to  
164 represent the relationships between these BED domains (Figure 3d; Supplementary Figure 9).  
165 Overall, BED domains are diverse, although there is evidence of a split between BED  
166 domains from BED-NLRs and non-NLR proteins (only 7 of 83 non-NLRs clustered with the  
167 BED-NLRs). Given that the base of the split is broad, integrated BED-domains most likely  
168 derive from multiple integration events. However, *Yr7* and *Yr5/YrSP* both arose from a

169 common integration event that occurred before the *Brachypodium*-wheat divergence  
170 (Supplementary Figure 9, purple). This is consistent with the hypothesis that integrated  
171 domains might have evolved to strengthen the interaction with pathogen effectors after  
172 integration<sup>28</sup>, although we cannot exclude the potential role of the BED domains in signalling  
173 at this stage.

174

175 Among BED-NLRs, BED-I and BED-II constitute two major clades, consistent with their  
176 relatively low amino acid conservation (Figure 3b), that are comprised solely of genes from  
177 within the *Yr7/Yr5/YrSP* syntenic region. Seven non-NLR BED domain wheat proteins  
178 clustered with BED-NLRs. These are most closely related to the *Brachypodium* and rice  
179 BED-NLR proteins and were not expressed in RNA-Seq data from a *Yr5* time-course (re-  
180 analysis of published data<sup>29</sup>; Supplementary Figure 10, Supplementary Table 12). Similarly,  
181 no BED-containing protein was differentially expressed during this infection time-course,  
182 consistent with the prediction that effectors alter their targets' activity at the protein level in  
183 the integrated-decoy model<sup>5</sup>. We cannot however disprove that these closely related BED-  
184 containing proteins are involved in BED-NLR-mediated resistance.

185

186 BED-NLRs are frequent in Triticeae, and occur in other monocot and dicot tribes<sup>6-8</sup>. To date  
187 a single BED-NLR gene, *Xal*, has been shown to confer resistance to plant pathogens<sup>10,11</sup>. In  
188 the present study, we show that the distinct *Yr7*, *Yr5*, and *YrSP* resistance specificities belong  
189 to a complex NLR cluster on chromosome 2B and are encoded by two paralogous BED-  
190 NLRs genes. We report an allelic series for the *Yr5/YrSP* gene with five independent alleles,  
191 including three full-length BED-NLRs (including *Yr5*) and two truncated versions (including  
192 *YrSP*). This wider allelic series could be of functional significance as previously shown for  
193 the *Mla* and *Pm3* loci that confer resistance to *Blumeria graminis*<sup>22,30</sup> in barley and wheat,



194 respectively, and the flax *L* locus conferring resistance to *Melampsora lini*<sup>31</sup>. Overall, our  
195 results add strong evidence for the importance of the BED-NLR architecture in plant-  
196 pathogen interactions. The paralogous and allelic relationship of these three distinct *Yr* loci  
197 will inform future hypothesis-driven engineering of novel recognition specificities.

198 **Methods**

199 **MutRenSeq**

200 *Mutant identification*

201 Supplementary Table 3 summarises plant materials and *Pst* isolates used to identify mutants  
202 for each *Yr* gene. We used an EMS-mutagenised population in cultivar Cadenza<sup>32</sup> to identify  
203 mutants in *Yr7*; whereas EMS-populations in the corresponding AvocetS-*Yr* near isogenic  
204 line (NIL) were used to identify *Yr5* and *YrSP* mutants. For *Yr7*, we inoculated M<sub>3</sub> plants  
205 from the Cadenza EMS population with *Pst* isolate 08/21 which is virulent to *Yr1*, *Yr2*, *Yr3*,  
206 *Yr4*, *Yr6*, *Yr9*, *Yr17*, *Yr27*, *Yr32*, *YrRob*, and *YrSol*<sup>33</sup>. We hypothesised that susceptible  
207 mutants would carry mutations in *Yr7*. Plants were grown in 192-well trays in a confined  
208 glasshouse with no supplementary lights or heat. Inoculations were performed at the one leaf  
209 stage (Zadoks 11) with a talc – urediniospore mixture. Trays were kept in darkness at 10 °C  
210 and 100% humidity for 24 hours. Infection types (IT) were recorded 21 days post-inoculation  
211 (dpi) following the Grassner and Straib scale<sup>34</sup>. Identified susceptible lines were progeny  
212 tested to confirm the reliability of the phenotype and DNA from M<sub>4</sub> plants was used for  
213 RenSeq (see section below). Similar methods were used for AvocetS-*Yr7*, AvocetS-*Yr5*, and  
214 AvocetS-*YrSP* EMS-mutagenised populations with the following exceptions: *Pst* pathotypes  
215 108 E141 A+ (University of Sydney Plant Breeding Institute Culture no. 420), 150 E16 A+  
216 (Culture no. 598) and 134 E16 A+ (Culture no. 572) were used to evaluate *Yr7*, *Yr5*, and  
217 *YrSP* mutants, respectively. EMS-derived susceptible mutants in Lemhi-*Yr5* were previously  
218 identified<sup>35</sup> and DNA from M<sub>5</sub> plants was used for RenSeq.

219

220 *DNA preparation, resistance gene enrichment and sequencing (RenSeq)*

221 We extracted total genomic DNA from young leaf tissue using the large-scale DNA  
222 extraction protocol from the McCouch Lab ([https://ricelab.plbr.cornell.edu/dna\\_extraction](https://ricelab.plbr.cornell.edu/dna_extraction))

223 and a previously described method<sup>36</sup>. We checked DNA quality and quantity on a 0.8%  
224 agarose gel and with a NanoDrop spectrophotometer (Thermo Scientific). Arbor Biosciences  
225 (Ann Arbor, MI, USA) performed the targeted enrichment of NLRs according to the MYbaits  
226 protocol using an improved version of the previously published Triticeae bait library  
227 available at [github.com/steuernb/MutantHunter](https://github.com/steuernb/MutantHunter). Library construction was performed using  
228 the TruSeq RNA protocol v2 (Illumina 15026495). Libraries were pooled with one pool of  
229 samples for Cadenza mutants and one pool of eight samples for the Lemhi-*Yr5* parent and  
230 Lemhi-*Yr5* mutants. AvocetS-*Yr5* and AvocetS-*YrSP* wild-type, together with their respective  
231 mutants, were also processed according to the MYbaits protocol and the same bait library  
232 was used. All enriched libraries were sequenced on a HiSeq 2500 (Illumina) in High Output  
233 mode using 250 bp paired end reads and SBS chemistry. For the Cadenza wild-type, we  
234 generated data on an Illumina MiSeq instrument. In addition to the mutants, we also  
235 generated RenSeq data for Kronos and Paragon to assess the presence of *Yr5* in Kronos and  
236 *Yr7* in Paragon. Details of all the lines sequenced, alongside NCBI accession numbers, are  
237 presented in Supplementary Tables 3 and 12.

238

### 239 **MutantHunter pipeline**

240 We adapted the pipeline from <https://github.com/steuernb/MutantHunter/> to identify  
241 candidate contigs for the targeted *Yr* genes. First, we trimmed the RenSeq-derived reads with  
242 trimmomatic<sup>37</sup> using the following parameters: ILLUMINACLIP:TruSeq2-PE.fa:2:30:10  
243 LEADING:30 TRAILING:30 SLIDINGWINDOW:10:20 MINLEN:50 (v0.33). We made *de*  
244 *novo* assemblies of wild-type plant trimmed reads with the CLC assembly cell and default  
245 parameters apart from the word size (-w) parameter that we set to 64 (v5.0,  
246 <http://www.clcbio.com/products/clc-assembly-cell/>) (Supplementary Table 14). We then  
247 followed the MutantHunter pipeline detailed at <https://github.com/steuernb/MutantHunter/>.

248 For Cadenza mutants, we used the following MutantHunter program parameters to identify  
249 candidate contigs: -c 20 -n 6 -z 1000. These options require a minimum coverage of 20x for  
250 SNPs to be called; at least six susceptible mutants must have a mutation in the same contig to  
251 report it as candidate; small deletions were filtered out by setting the number of coherent  
252 positions with zero coverage to call a deletion mutant at 1000. The -n parameter was  
253 modified accordingly in subsequent runs with the Lemhi-*Yr5* datasets (-n 6).

254

255 To identify *Yr5* and *YrSP* contigs from Avocet mutants, we followed the MutantHunter  
256 pipeline with all default parameters, except in the use of CLC Genomics Workbench (v10)  
257 for reads QC, trimming, *de novo* assembly of Avocet wild-type and mapping all the reads  
258 against *de novo* wild-type assembly. The default MutantHunter parameters were used except  
259 that -z was set as 100. The parameter -n was set to 2 in the first run and then to 3 in the  
260 second run. Two *Yr5* mutants were most likely sibling lines as they carried identical  
261 mutations at the same position (Supplementary Figure 2, Supplementary Table 4).

262

263 For *Yr7* we identified a single contig with six mutations, however we did not identify  
264 mutations in line Cad0903. Upon examination of the *Yr7* candidate contig we predicted that  
265 the 5' region was likely to be missing (Supplementary Figure 2). We thus annotated potential  
266 NLRs in the Cadenza genome assembly available from the Earlham Institute (Supplementary  
267 Table 5, [http://opendata.earlham.ac.uk/Triticum\\_aestivum/EI/v1.1](http://opendata.earlham.ac.uk/Triticum_aestivum/EI/v1.1)) with the NLR-Annotator  
268 program using default parameters (<https://github.com/steuernb/NLR-Annotator>). We  
269 identified an annotated NLR in the Cadenza genome with 100% sequence identity to the *Yr7*  
270 candidate contig, which extended beyond our *de novo* assembled sequence. We therefore  
271 replaced the previous candidate contig with the extended Cadenza sequence (100% sequence  
272 identity) and mapped the RenSeq reads from Cadenza wild-type and mutants as described

273 above. This confirmed the candidate contig for *Yr7* as we retrieved the missing 5' region  
274 including the BED domain. The improved contig now also contained a mutation in the  
275 outstanding mutant line Cad0903 (Supplementary Figure 2). The Triticeae bait library does  
276 not include integrated domains in its design so they are prone to be missed, especially when  
277 located at the ends of an NLR. Sequencing technology could also have accounted for this:  
278 MiSeq was used for Cadenza wild-type whereas HiSeq was chosen for Lemhi-*Yr5* and we  
279 recovered the 5' region in the latter, although coverage was lower than for the regions  
280 encoding canonical domains. In summary, we sequenced nine, ten, and four mutants for *Yr7*,  
281 *Yr5*, and *YrSP*, respectively and identified for each target gene a single contig that accounted  
282 for all mutants.

283

#### 284 **Candidate contig confirmation and gene annotation**

285 We sequenced the *Yr7*, *Yr5*, and *YrSP* candidate contigs from the mutant lines (annotated in  
286 Supplementary Files 1 and 2) to confirm the EMS-derived mutations using primers  
287 documented in Supplementary Table 15. We first PCR-amplified the complete locus from the  
288 same DNA preparations as the ones submitted for RenSeq with the Phusion® High-Fidelity  
289 DNA Polymerase (New England Biolabs) following the suppliers protocol  
290 (<https://www.neb.com/protocols/0001/01/01/pcr-protocol-m0530>). We then carried out  
291 nested PCR on the obtained product to generate overlapping 600-1,000 bp amplicons that  
292 were purified using the MiniElute kit (Qiagen). The purified PCR products were sequenced  
293 by GATC following the LightRun protocol ([https://www.gatc-biotech.com/shop/en/lightrun-](https://www.gatc-biotech.com/shop/en/lightrun-tube-barcode.html)  
294 [tube-barcode.html](https://www.gatc-biotech.com/shop/en/lightrun-tube-barcode.html)). Resulting sequences were aligned to the wild-type contig using  
295 ClustalOmega (<https://www.ebi.ac.uk/Tools/msa/clustalo/>). This allowed us to curate the *Yr7*  
296 locus in the Cadenza assembly that contained two sets of unknown ('N') bases in its

297 sequence, corresponding to a 39 bp insertion and a 129 bp deletion (Supplementary File 3),  
298 and to confirm the presence of the mutations in each mutant line.

299 We used HISAT2<sup>38</sup> (v2.1) to map RNA-Seq reads available from Cadenza and AvocetS-  
300 *Yr5*<sup>29</sup> to the RenSeq *de novo* assemblies with curated loci to define the structure of the genes.  
301 We used the following parameters: --no-mixed --no-discordant to map reads in pairs only.  
302 We used the --novel-splicesite-outfile to predict splicing sites that we manually scrutinised  
303 with the genome visualisation tool IGV<sup>39</sup> (v2.3.79). Predicted coding sequences (CDS) were  
304 translated using the ExPASy online tool (<https://web.expasy.org/translate/>). This allowed us  
305 to predict the effect of the mutations on each candidate transcript (Figure 1a; Supplementary  
306 Table 4). The long-range primers for both *Yr7* and *Yr5* loci were then used on the  
307 corresponding susceptible Avocet NIL mutants to determine whether the genes were present  
308 and carried mutations in that background (Figure 1a; Supplementary Files 1 and 2).

309

### 310 **Coiled coil domain prediction**

311 To determine whether *Yr7*, *Yr5*, and *YrSP* encode Coiled Coil (CC) domains we used the  
312 NCOILS prediction program<sup>40</sup> (v1.0, [https://embnet.vital-it.ch/software/COILS\\_form.html](https://embnet.vital-it.ch/software/COILS_form.html))  
313 with the following parameters: MTK matrix with applying a 2.5-fold weighting of positions  
314 a,d. We compared the profiles to those obtained with already characterised CC-NLR  
315 encoding genes *Sr33*, *Mla10*, *Pm3* and *RPS5* (Supplementary Figure 4). We also ran the  
316 program on *Yr7* and *Yr5* protein sequences where the BED domain was manually removed to  
317 determine whether its integration could have disrupted an existing CC domain. To further  
318 investigate whether *Yr7*, *Yr5*, and *YrSP* encode CC domains we performed a BLASTP  
319 analysis<sup>41</sup> with their N-terminal region, from the methionine to the first amino acid encoding  
320 the NB-ARC domain, with or without the BED domain (Supplementary Figure 4).

321

## 322 **Genetic linkage**

323 We generated a set of F<sub>2</sub> populations to genetically map the candidate contigs  
324 (Supplementary Table 3). For *Yr7* we developed an F<sub>2</sub> population based on a cross between  
325 the susceptible mutant line Cad0127 to the Cadenza wild-type (population size 139  
326 individuals). For *Yr5* and *YrSP* we developed F<sub>2</sub> populations between AvocetS and the NILs  
327 carrying the corresponding *Yr* gene (94 individuals for *YrSP* and 376 for *Yr5*). We extracted  
328 DNA from leaf tissue at the seedling stage (Zadoks 11) following a previously published  
329 protocol<sup>42</sup> and Kompetitive Allele Specific PCR (KASP) assays were carried out as described  
330 in<sup>43</sup>. R/qtl package<sup>44</sup> was used to produce the genetic map based on a general likelihood ratio  
331 test and genetic distances were calculated from recombination frequencies (v1.41-6).

332

333 We used previously published markers linked to *Yr7*, *Yr5*, and *YrSP* (WMS526, WMS501  
334 and WMC175, WMC332, respectively<sup>15,18,19</sup>) in addition to closely linked markers WMS120,  
335 WMS191, and WMC360 (based on the GrainGenes database  
336 <https://wheat.pw.usda.gov/GG3/>) to define the physical region on the Chinese Spring  
337 assembly RefSeq v1.0 (<https://wheat-urgi.versailles.inra.fr/Seq-Repository/Assemblies>). Two  
338 different approaches were used for genetic mapping depending on the material. For *Yr7*, we  
339 used the public data<sup>32</sup> for Cad0127 ([www.wheat-tilling.com](http://www.wheat-tilling.com)) to identify nine mutations  
340 located within the *Yr7* physical interval based on BLAST analysis against RefSeq v1.0. We  
341 used KASP primers when available and manually designed additional ones including an  
342 assay targeting the Cad0127 mutation in the *Yr7* candidate contig (Supplementary Table 15).  
343 We genotyped the Cad0127 F<sub>2</sub> populations using these nine KASP assays and confirmed  
344 genetic linkage between the Cad0127 *Yr7* candidate mutation and the nine mutations across  
345 the physical interval (Supplementary Figure 3).

346

347 For *Yr5* and *YrSP*, we first aligned the candidate contigs to the best BLAST hit in an AvocetS  
348 RenSeq *de novo* assembly. We then designed KASP primers targeting polymorphisms  
349 between these sequences and used them to genotype the corresponding F<sub>2</sub> population  
350 (Supplementary Table 15). For both candidate contigs we confirmed genetic linkage with the  
351 previously published genetic intervals for these *Yr* genes (Supplementary Figure 3).

352

### 353 ***Yr7* gene-specific markers**

354 We aligned the *Yr7* sequence with the best BLAST hits in the genomes listed on  
355 Supplementary Table 5 and designed KASP primers targeting polymorphisms that were *Yr7*-  
356 specific. Three markers were retained after testing on a selected panel of Cadenza-derivatives  
357 and cultivars that were positive for *Yr7* markers in the literature, including the *Yr7* reference  
358 cultivar Lee (Supplementary Table 8, 8 and 15). The panel of Cadenza-derivatives was  
359 phenotyped with three *Pst* isolates: *Pst* 08/21 (*Yr7*-avirulent), *Pst* 15/151 (*Yr7*-avirulent –  
360 virulent to *Yr1*, 2, 3, 4, 6, 9, 17, 25, 32, *Rendezvous*, *Sp*, *Robigus*, *Solstice*) and *Pst* 14/106  
361 (*Yr7*-virulent, virulent to *Yr1*, 2, 3, 4, 6, 7, 9, 17, 25, 32, *Sp*, *Robigus*, *Solstice*, *Warrior*,  
362 *Ambition*, *Cadenza*, *KWS Sterling*, *Apache*) to determine whether *Yr7*-positive cultivars, as  
363 identified by the three KASP markers, displayed a consistent specificity (Supplementary  
364 Table 8). Pathology assays were performed as for the screening of the Cadenza mutant  
365 population. We retrieved pedigree information for the analysed cultivars from the Genetic  
366 Resources Information System for Wheat and Triticale database (GRIS,  
367 [www.wheatpedigree.net](http://www.wheatpedigree.net)) and used the Helium software<sup>45</sup> (v1.17) to illustrate the breeding  
368 history of *Yr7* in the UK (Supplementary Figure 5).

369

370 We used the three *Yr7* KASP markers to genotype (i) cultivars from the AHDB Wheat  
371 Recommended List from 2005-2018 (<https://cereals.ahdb.org.uk/varieties/ahdb->



372 recommended-lists.aspx); (ii) the Gediflux collection of European bread wheat cultivars  
373 released between 1920 and 2010<sup>25</sup> and (iii) the core Watkins collection, which represents a  
374 global set of wheat landraces collected in the 1930s<sup>24</sup>. Results are reported in Supplementary  
375 Table 9.

376

### 377 ***Yr5* and *YrSP* gene-specific markers**

378 We identified a 774 bp insertion in the *Yr5* allele 29 bp upstream of the STOP codon with  
379 respect to the Cadenza and Claire alleles. Genomic DNA from *YrSP* confirmed that the  
380 insertion was specific to *Yr5*. We used this polymorphism to design primers flanking the  
381 insertion and tested them on a subset of the collections mentioned above. We added 32 DNA  
382 sample from diverse accessions of *Triticum dicoccoides*, the wild progenitor of domesticated  
383 wheat (passport data shown in Supplementary Table 17). We included DNA from *Triticum*  
384 *aestivum* ssp. *spelta* var. *album*<sup>35</sup> (*Yr5* donor) and Spaldings Prolific (*YrSP* donor) to assess  
385 their amplification profiles. PCR amplification was conducted using a touchdown  
386 programme: 10 cycles, -0.5 °C per cycle starting from 67 °C and the remaining 25 cycles at  
387 62 °C. This allowed us to increase the specificity of the reaction. We observed three different  
388 profiles on the tested varieties; (i) a 1,281 bp amplicon in *Yr5* positive cultivars, (ii) a 507 bp  
389 amplicon in the alternate *Yr5* allele carriers, including AvocetS-*YrSP*, Cadenza, and Claire,  
390 and (iii) no amplification in other varieties. We sequenced the different amplicons and  
391 confirmed the insertion in *Yr5* compared to the alternate alleles (Supplementary File 2). The  
392 lack of amplicons in some varieties most likely represents the absence of the loci in the  
393 tested varieties. For *YrSP*, we aligned the *YrSP* and *Yr5* sequences to design KASP primers  
394 targeting the G to C SNP between the two alleles (Supplementary File 2, Supplementary  
395 Table 16). We tested the marker by genotyping selected cultivars as controls and cultivars  
396 from the AHDB Wheat Recommended List from 2005-2018 (Supplementary Table 9).

397

398 ***In silico* allele mining for Yr7 and Yr5**

399 We used the Yr7 and Yr5 sequences to retrieve the best BLAST hits in the *T. aestivum* and *T.*  
400 *turgdium* wheat genomes listed in Supplementary Table 5. The best Yr5 hits shared between  
401 93.6 and 99.3% sequence identity, which was comparable to what was observed for alleles  
402 derived from the wheat *Pm3* (>97% identity)<sup>46</sup> and flax *L* (>90% identity)<sup>31</sup> genes. Yr7 was  
403 identified only in Paragon and Cadenza (Supplementary Table 6; See Supplementary File 3  
404 for curation of the Paragon sequence).

405

406 **Analysis of the Yr7 and Yr5/YrSP cluster on RefSeq v1.0**

407 *Definition of syntenic regions across grass genomes*

408 We used NLR-Annotator to identify putative NLR loci on RefSeq v1.0 chromosome 2B and  
409 identified the best BLAST hits to Yr7 and Yr5 on RefSeq v1.0. Additional BED-NLRs and  
410 canonical NLRs were annotated in close physical proximity to these best BLAST hits.  
411 Therefore, to better define the NLR cluster we selected ten non-NLR genes located both  
412 distal and proximal to the region, and identified orthologs in barley, *Brachypodium*, and rice  
413 in *EnsemblPlants* (<https://plants.ensembl.org/>). We used different % ID cutoffs for each  
414 species (>92% for barley, >84% for *Brachypodium*, and >76% for rice) and determined the  
415 syntenic region when at least three consecutive orthologues were found. A similar approach  
416 was conducted for *Triticum* ssp and *Ae. tauschii* (Supplementary file 4).

417

418 *Definition of the NLR content of the syntenic region*

419 We extracted the previously defined syntenic region from the grass genomes listed in  
420 Supplementary Table 5 and annotated NLR loci with NLR-Annotator. We maintained  
421 previously defined gene models where possible, but also defined new gene models that were

422 further analysed through a BLASTx analysis to confirm the NLR domains (Supplementary  
423 Files 4 and 5). The presence of BED domains in these NLRs was also confirmed by CD-  
424 Search (<https://www.ncbi.nlm.nih.gov/Structure/cdd/wrpsb.cgi>).

425

#### 426 **Phylogenetic and neighbour network analyses**

427 We aligned the translated NB-ARC domains from the NLR-Annotator output with  
428 MUSCLE<sup>47</sup> using default parameters (v.3.8.31). We verified and manually curated the  
429 alignment with Jalview<sup>48</sup> (v2.10.1). We used Gblocks<sup>49</sup> (v0.91b) with the following  
430 parameters: Minimum Number Of Sequences For A Conserved Position: 9; Minimum  
431 Number Of Sequences For A Flanking Position: 14; Maximum Number Of Contiguous  
432 Nonconserved Positions: 8; Minimum Length Of A Block: 10; Allowed Gap Positions: None;  
433 Use Similarity Matrices: Yes; to eliminate poorly aligned positions. This resulted in 36% of  
434 the original 156 positions being taken forward for the phylogeny. We built a Maximum  
435 Likelihood tree with the RAxML<sup>50</sup> program and the following parameters: raxmlHPC -f a -x  
436 12345 -p 12345 -N 1000 -m PROTCATJTT -s <input\_alignment.fasta> (MPI version  
437 v8.2.10). The best scoring tree with associated bootstrap values was visualised and mid-  
438 rooted with Dendroscope<sup>51</sup> (v3.5.9). There was clear separation between NLRs belonging to  
439 the two different clusters but the sub-clades had less support. One explanation would be that  
440 conflicting phylogenetic signals that are due to events such as hybridization, horizontal gene  
441 transfer, recombination, or gene duplication and loss might have occurred in the region. Split  
442 networks allow nodes that do not represent ancestral species and can thus represent such  
443 incompatible and ambiguous signals. We therefore used this method in the following part of  
444 the analysis to analyse the relationship between the BED domains.

445

446 We used the Neighbour-net method<sup>52</sup> implemented in SplitsTree4<sup>27</sup> (v4.16) to analyse the  
447 relationships between BED domains from NLR and non-NLR proteins. First we retrieved all  
448 BED-containing proteins from RefSeq v1.0 using the following steps: we used hmmer  
449 (v3.1b2, <http://hmmer.org/>) to identify conserved domains in protein sequences from RefSeq  
450 v1.0. We applied a cut-off of 0.01 on i-evalue to filter out any irrelevant identified domains.  
451 We separated the set between NLR and non-NLRs based on the presence of the NB-ARC and  
452 sequence homology for single BED proteins. BED domains were extracted from the  
453 corresponding protein sequences based on the hmmer output and were verified on the CD-  
454 search database. Alignments of the BED domains were performed in the same way as for  
455 NB-ARC domains and were used to generate a neighbour network in SplitsTree4 based on  
456 the uncorrected P distance matrix.

457

## 458 **Transcriptome analysis**

### 459 *Kronos analysis*

460 We reanalysed RNA-Seq data from cultivar Kronos<sup>53</sup> to determine whether the Kronos *Yr5*  
461 allele was expressed. We followed the same strategy as that described to define the *Yr7* and  
462 *Yr5* gene structures (candidate contig confirmation and gene annotation section). We  
463 generated a *de novo* assembly of the Kronos NLR repertoire from Kronos RenSeq data and  
464 used it as a reference when mapping read data from one replicate of the wild-type Kronos at  
465 heading stage. Read depths up to 30x were present for the *Yr5* allele which allowed  
466 confirmation of its expression. Likewise, the RNA-Seq reads confirmed the gene structure,  
467 which is similar to *YrSP*, and the premature termination codon in Kronos *Yr5*. Whether this  
468 allele confers resistance against *Pst* remains to be elucidated.

469

470 *Re-analysis of RNA-Seq data in Dobon et al., 2016*

471 We used RNA-Seq data previously published by Dobon and colleagues<sup>18</sup>. Briefly, two RNA-  
472 Seq time-courses were used based on samples taken from leaves at 0, 1, 2, 3, 5, 7, 9, and 11  
473 dpi for the susceptible cultivar Vuka and 0, 1, 2, 3, and 5 dpi for the resistant AvocetS-Yr5<sup>29</sup>.  
474 We used normalised read counts (Transcript Per Million, TPM) from Ramirez-Gonzalez et al.  
475 2018 to produce the heatmap shown in Supplementary Figure 10 with the pheatmap R  
476 package<sup>54</sup> (v1.0.8). Transcripts were clustered according to their expression profile as defined  
477 by a Euclidean distance matrix and hierarchical clustering. Transcripts were considered  
478 expressed if their average TPM was  $\geq 0.5$  TPM in at least one time point. We used the  
479 DESeq2 R package<sup>55</sup> (v1.18.1) to conduct a differential expression analysis. We performed  
480 two comparisons: (1) we used a likelihood ratio test to compare the full model  $\sim$  Cultivar +  
481 Time + Cultivar:Time to the reduced model  $\sim$  Cultivar + Time to identify genes that were  
482 differentially expressed between the two cultivars at a given time point after 0 dpi (workflow:  
483 <https://www.bioconductor.org/help/workflows/rnaseqGene/>); (2) Investigation of both time  
484 courses in Vuka and AvocetS-Yr5 independently to generate all of the comparisons between  
485 0 dpi and any given time point, following the standard DESeq2 pipeline. Genes were  
486 considered as differentially expressed genes if they showed an adjusted p-value  $< 0.05$  and a  
487 log<sub>2</sub> fold change of 2 or higher. Most BED-containing proteins and BED-NLRs were not  
488 expressed in the analysed data. No pattern was observed for those that were expressed:  
489 differences were observed between cultivars, but these were independent of the presence of  
490 the yellow rust pathogen.

491

## 492 **References**

- 493 1. Oerke, E. C. Crop losses to pests. *J. Agric. Sci.* **144**, 31–43 (2006).
- 494 2. Hubbard, A. *et al.* Field pathogenomics reveals the emergence of a diverse wheat  
495 yellow rust population. *Genome Biol.* **16**, 23 (2015).
- 496 3. Aravind, L. The BED finger, a novel DNA-binding domain in chromatin-boundary-  
497 element-binding proteins and transposases. *Trends Biochem. Sci.* **25**, 421–423 (2000).

- 498 4. Jones, J. D. G. & Dangl, J. L. The plant immune system. *Nature* **444**, 323–329 (2006).
- 499 5. Kourelis, J. & van der Hoorn, R. A. L. Defended to the nines: 25 years of resistance  
500 gene cloning identifies nine mechanisms for R protein function. *Plant Cell* (2018).  
501 doi:10.1105/tpc.17.00579
- 502 6. Sarris, P. F., Cevik, V., Dagdas, G., Jones, J. D. G. & Krasileva, K. V. Comparative  
503 analysis of plant immune receptor architectures uncovers host proteins likely targeted  
504 by pathogens. *BMC Biol.* **14**, 8 (2016).
- 505 7. Kroj, T., Chanclud, E., Michel-Romiti, C., Grand, X. & Morel, J.-B. Integration of  
506 decoy domains derived from protein targets of pathogen effectors into plant immune  
507 receptors is widespread. *New Phytol.* **210**, 618–626 (2016).
- 508 8. Bailey, P. C. *et al.* Dominant integration locus drives continuous diversification of  
509 plant immune receptors with exogenous domain fusions. *Genome Biol.* **19**, 23 (2018).
- 510 9. Bundock, P. & Hooykaas, P. An *Arabidopsis* hAT-like transposase is essential for  
511 plant development. *Nature* **436**, 282–284 (2005).
- 512 10. Yoshimura, S. *et al.* Expression of *Xa1*, a bacterial blight-resistance gene in rice, is  
513 induced by bacterial inoculation. *Proc. Natl. Acad. Sci. U. S. A.* **95**, 1663–1668 (1998).
- 514 11. Das, B., Sengupta, S., Prasad, M. & Ghose, T. Genetic diversity of the conserved  
515 motifs of six bacterial leaf blight resistance genes in a set of rice landraces. *BMC*  
516 *Genet.* **15**, 82 (2014).
- 517 12. Law, C. N. Genetic control of yellow rust resistance in *T. spelta* Album. *Plant Breed.*  
518 *Institute, Cambridge, Annu. Rep.* **1975**, 108–109 (1976).
- 519 13. Johnson, R. & Dyck, P. L. Resistance to yellow rust in *Triticum spelta* var. Album and  
520 bread wheat cultivars Thatcher and Lee. *Colloq. l'INRA* (1984).
- 521 14. Zhang, P., McIntosh, R. A., Hoxha, S. & Dong, C. M. Wheat stripe rust resistance  
522 genes *Yr5* and *Yr7* are allelic. *Theor. Appl. Genet.* **120**, 25–29 (2009).
- 523 15. Feng, J. Y. *et al.* Molecular mapping of *YrSP* and its relationship with other genes for  
524 stripe rust resistance in wheat chromosome 2BL. *Phytopathology* **105**, 1206–1213  
525 (2015).
- 526 16. Zhan, G. *et al.* Virulence and molecular diversity of the *Puccinia striiformis* f. sp.  
527 *tritici* population in Xinjiang in relation to other regions of western China. *Plant Dis.*  
528 **100**, 99–107 (2016).
- 529 17. Steuernagel, B. *et al.* Rapid cloning of disease-resistance genes in plants using  
530 mutagenesis and sequence capture. *Nat. Biotechnol.* **34**, 652–655 (2016).
- 531 18. Sun, Q., Wei, Y., Ni, Z., Xie, C. & Yang, T. Microsatellite marker for yellow rust  
532 resistance gene *Yr5* in wheat introgressed from spelt wheat. *Plant Breed.* **121**, 539–541  
533 (2002).
- 534 19. Yao, Z. J. *et al.* The molecular tagging of the yellow rust resistance gene *Yr7* in wheat  
535 transferred from differential host Lee using microsatellite markers. *Sci. Agric. Sin.* **39**,  
536 1146–1152 (2006).
- 537 20. Bai, S. *et al.* Structure-function analysis of barley NLR immune receptor MLA10  
538 reveals its cell compartment specific activity in cell death and disease resistance. *PLoS*  
539 *Pathog.* **8**, e1002752 (2012).
- 540 21. Periyannan, S. *et al.* The gene *Sr33*, an ortholog of barley *Mla* genes, encodes

- 541 resistance to wheat stem rust race Ug99. *Science*. **341**, 786–788 (2013).
- 542 22. Srichumpa, P., Brunner, S., Keller, B. & Yahiaoui, N. Allelic series of four powdery  
543 mildew resistance genes at the Pm3 locus in hexaploid bread wheat. *Plant Physiol.*  
544 **139**, 885–895 (2005).
- 545 23. Sarris, P. F. *et al.* A plant immune receptor detects pathogen effectors that target  
546 WRKY transcription factors. *Cell* **161**, 1089–1100 (2015).
- 547 24. Wingen, L. U. *et al.* Establishing the A. E. Watkins landrace cultivar collection as a  
548 resource for systematic gene discovery in bread wheat. *Theor. Appl. Genet.* **127**, 1831–  
549 1842 (2014).
- 550 25. Reeves, J. C. *et al.* Changes over time in the genetic diversity of four major European  
551 crops - a report from the Gediflux Framework 5 project. *Genet. Var. plant breeding.*  
552 *Proc. 17th EUCARPIA Gen. Congr. Tulln, Austria, 8-11 Sept. 2004* 3–7 (2004).
- 553 26. Ellis, J. G., Lagudah, E. S., Spielmeyer, W. & Dodds, P. N. The past, present and  
554 future of breeding rust resistant wheat. *Front Plant Sci* **5**, 641 (2014).
- 555 27. Huson, D. H. & Bryant, D. Application of phylogenetic networks in evolutionary  
556 studies. *Mol. Biol. Evol.* **23**, 254–267 (2006).
- 557 28. Ellis, J. G. Integrated decoys and effector traps: how to catch a plant pathogen. *BMC*  
558 *Biol.* **14**, 13 (2016).
- 559 29. Dobon, A., Bunting, D. C. E., Cabrera-Quio, L. E., Uauy, C. & Saunders, D. G. O. The  
560 host-pathogen interaction between wheat and yellow rust induces temporally  
561 coordinated waves of gene expression. *BMC Genomics* **17**, 380 (2016).
- 562 30. Seeholzer, S. *et al.* Diversity at the *Mla* powdery mildew resistance locus from  
563 cultivated barley reveals sites of positive selection. *Mol. Plant-Microbe Interact.* **23**,  
564 497–509 (2010).
- 565 31. Ellis, J. G., Lawrence, G. J., Luck, J. E. & Dodds, P. N. Identification of regions in  
566 alleles of the flax rust resistance gene *L* that determine differences in gene-for-gene  
567 specificity. *Plant Cell* **11**, 495–506 (1999).
- 568 32. Krasileva, K. V *et al.* Uncovering hidden variation in polyploid wheat. *Proc. Natl.*  
569 *Acad. Sci. U. S. A.* **6**, E913–E921 (2017).
- 570 33. Hubbard, A. J., Fanstone, V. & Bayles, R. A. *UKCPVS 2009 Annual report.*
- 571 34. Gassner, G. & Straib, W. *Die Bestimmung der biologischen Rassen des*  
572 *Weizengelbrostes Puccinia glumarum f.sp. tritici Schmidt Erikss. u. Henn.* (1932).
- 573 35. McGrann, G. R. D. *et al.* Genomic and genetic analysis of the wheat race-specific  
574 yellow rust resistance gene *Yr5*. *J. Plant Sci. Mol. Breed.* **3**, (2014).
- 575 36. Lagudah, E. S., Appels, R., Brown, A. H. D. & McNeil, D. The molecular–genetic  
576 analysis of *Triticum tauschii*, the D-genome donor to hexaploid wheat. *Genome* **34**,  
577 375–386 (1991).
- 578 37. Bolger, A. M., Lohse, M. & Usadel, B. Trimmomatic: a flexible trimmer for Illumina  
579 sequence data. *Bioinformatics* **30**, 2114–2120 (2014).
- 580 38. Kim, D., Langmead, B. & Salzberg, S. L. HISAT: a fast spliced aligner with low  
581 memory requirements. *Nat. Methods* **12**, 357–360 (2015).
- 582 39. Thorvaldsdottir, H., Robinson, J. T. & Mesirov, J. P. Integrative Genomics Viewer



- 583 (IGV): high-performance genomics data visualization and exploration. *Brief.*  
584 *Bioinform.* **14**, 178–192 (2013).
- 585 40. Lupas, A., Dyke, M. Van & Stock, J. Predicting coiled coils from protein sequences.  
586 *Science.* **252**, 1162–1164 (1991).
- 587 41. Altschul, S. F. *et al.* Protein database searches using compositionally adjusted  
588 substitution matrices. *FEBS J.* **272**, 5101–9 (2005).
- 589 42. Pallotta, M. A. *et al.* Marker assisted wheat breeding in the southern region of  
590 Australia. in *Proceedings of 10th International Wheat Genet Symposium Instituto*  
591 *Sperimentale per la Cerealicoltura Rome* 789–791 (2003).
- 592 43. Ramirez-Gonzalez, R. H. *et al.* RNA-Seq bulked segregant analysis enables the  
593 identification of high-resolution genetic markers for breeding in hexaploid wheat.  
594 *Plant Biotechnol J* **13**, 613–624 (2015).
- 595 44. Broman, K. W., Wu, H., Sen, S. & Churchill, G. A. R/qtl: QTL mapping in  
596 experimental crosses. *Bioinformatics* **19**, 889–890 (2003).
- 597 45. Shaw, P. D., Graham, M., Kennedy, J., Milne, I. & Marshall, D. F. Helium:  
598 visualization of large scale plant pedigrees. *BMC Bioinformatics* **15**, 259 (2014).
- 599 46. Brunner, S. *et al.* Intragenic allele pyramiding combines different specificities of  
600 wheat *Pm3* resistance alleles. *Plant J.* **64**, 433–445 (2010).
- 601 47. Edgar, R. C. MUSCLE: multiple sequence alignment with high accuracy and high  
602 throughput. *Nucleic Acids Res.* **32**, 1792–1797 (2004).
- 603 48. Waterhouse, A. M., Procter, J. B., Martin, D. M. A., Clamp, M. & Barton, G. J.  
604 Jalview Version 2--a multiple sequence alignment editor and analysis workbench.  
605 *Bioinformatics* **25**, 1189–1191 (2009).
- 606 49. Castresana, J. Selection of conserved blocks from multiple alignments for their use in  
607 phylogenetic analysis. *Mol. Biol. Evol.* **17**, 540–552 (2000).
- 608 50. Stamatakis, A. RAxML-VI-HPC: maximum likelihood-based phylogenetic analyses  
609 with thousands of taxa and mixed models. *Bioinformatics* **22**, 2688–2690 (2006).
- 610 51. Huson, D. H. & Scornavacca, C. Dendroscope 3: An interactive tool for rooted  
611 phylogenetic trees and networks. *Syst. Biol.* **61**, 1061–1067 (2012).
- 612 52. Bryant, D. & Moulton, V. Neighbor-Net: An agglomerative method for the  
613 construction of phylogenetic networks. *Mol. Biol. Evol.* **21**, 255–265 (2003).
- 614 53. Pearce, S. *et al.* Regulation of Zn and Fe transporters by the GPC1 gene during early  
615 wheat monocarpic senescence. *BMC Plant Biol.* **14**, 368 (2014).
- 616 54. Kolde, R. Pheatmap: pretty heatmaps. *R package version* (2015).
- 617 55. Love, M. I., Huber, W. & Anders, S. Moderated estimation of fold change and  
618 dispersion for RNA-seq data with DESeq2. *Genome Biol.* **15**, 550 (2014).
- 619 56. Jupe, F. *et al.* Identification and localisation of the NB-LRR gene family within the  
620 potato genome. *BMC Genomics* **13**, 75 (2012).
- 621 57. Warren, R. F., Henk, A., Mowery, P., Holub, E. & Innes, R. W. A mutation within the  
622 leucine-rich repeat domain of the arabidopsis disease resistance gene RPS5 partially  
623 suppresses multiple bacterial and downy mildew resistance genes. *Plant Cell* **10**,  
624 1439–1452 (1998).



- 625 58. Avni, R. *et al.* Wild emmer genome architecture and diversity elucidate wheat  
626 evolution and domestication. *Science* (80-. ). **357**, 93–97 (2017).
- 627 59. Luo, M.-C. *et al.* Genome sequence of the progenitor of the wheat D genome *Aegilops*  
628 *tauschii*. *Nature* **551**, 498 (2017).

#### 629 **Author contributions**

630 CM performed the experiments to clone *Yr7* and *Yr5* and the subsequent analyses of their loci  
631 and BED domains, designed the gene-specific markers, analysed the genotype data in the  
632 studied panels, and designed and made the figures. JZ performed the experiments to  
633 clone *YrSP*, confirm the *Yr7* and *Yr5* genes in AvocetS-*Yr7* and AvocetS-*Yr5* mutants, and  
634 identified the full length of *Yr5* and *YrSP* with their respective regulatory elements. CM and  
635 JZ developed the gene specific markers. PZ and RM performed the EMS treatment, isolation,  
636 and confirmation of *Yr7*, *Yr5*, and *YrSP* mutants in AvocetS NILs. PF performed the  
637 pathology work on the Cadenza *Yr7* mutants and the mapping populations. BS helped with  
638 the NLR annotator analysis and provided the bait library for target enrichment and  
639 sequencing of NLRs, NMA provided DNA samples for allelic variation studies and LB  
640 provided Lemhi-*Yr5* mutants. RM, EL, PZ, BW, SB, and CU conceived, designed, and  
641 supervised the research. CM and CU wrote the manuscript. JZ, PZ, RM, BW, NMA, LB and  
642 EL provided edits.

643

#### 644 **Data availability**

645 All sequencing data has been deposited in the NCBI Short Reads Archive under accession  
646 numbers listed in Supplementary Table 13 (SRP139043). Cadenza (*Yr7*) and Lemhi (*Yr5*)  
647 mutants are available through the JIC Germplasm Resource Unit ([www.seedstor.ac.uk](http://www.seedstor.ac.uk)).

648

#### 649 **Competing interests**

650 A patent application based on this work has been filed (United Kingdom Patent Application  
651 No. 1805865.1).

652 **Acknowledgements**

653 This work was supported by the UK Biotechnology and Biological Sciences Research  
654 Council Designing Future Wheat programme BB/P016855/1 and the Grains Research and  
655 Development Corporation, Australia. CM was funded by a PhD studentship from Group  
656 Limagrain and JZ is funded by PhD scholarships from the National Science Foundation  
657 (NSF) and the Monsanto Beachell-Borlaug International Scholars Programs (MBBISP). We  
658 thank community feedback on the initial preprint submission which helped improve the  
659 manuscript.

660 We thank the International Wheat Genome Sequencing Consortium for having providing us  
661 with pre-publication access to the RefSeq v1.0 assembly and gene annotation. We thank  
662 Jorge Dubcovsky and Xiaoqin Zhang (University of California, Davis) for providing *Yr5*  
663 cultivars. We thank the John Innes Centre Horticultural Services and Limagrain Rothwell  
664 staff for management of the wheat populations. Also Sebastian Specel (Limagrain; Clermont-  
665 Ferrand) and Richard Goram (JIC) for their help in designing and running KASP assays, and  
666 Sami Hoxha (The University of Sydney) for technical assistance. This research was  
667 supported by the NBI Computing Infrastructure for Science (CiS) group in Norwich, UK.

668 **Figure legends**

669 **Figure 1: *Yr5* and *YrSP* are allelic, but paralogous to *Yr7*.**

670 **a**, Left: Wild-type and selected EMS-derived susceptible mutant lines for *Yr7*, *Yr5*, and *YrSP*  
671 (Supplementary Table 3 and 3) inoculated with *Pst* isolate 08/21 (*Yr7*), *Pst* 150 E16 A+  
672 (*Yr5*), or *Pst* 134 E16 A+ (*YrSP*). Right: Candidate gene structures, with mutations in red,  
673 and their predicted effects on the translated protein. **b**, Schematic representation of the  
674 physical interval of the *Yr* loci. The *Yr7/Yr5/YrSP* locus is shown in orange on chromosome  
675 2B with previously published SSR markers in black. Markers developed in this study to  
676 confirm the genetic linkage between the phenotype and the candidate contigs are shown as  
677 black lines underneath the chromosome. *Yr* loci mapping intervals are defined by the red  
678 horizontal lines. A more detailed genetic map is shown in Supplementary Figure 3.

679

680 **Figure 2: *Yr7* and *Yr5/YrSP* encode integrated BED-domain immune receptor genes.**

681 **a**, Schematic representation of the *Yr7*, *Yr5*, and *YrSP* protein domain organisation. BED  
682 domains are highlighted in red, NB-ARC domains are in blue, LRR motifs from NLR-  
683 Annotator are in dark green, and manually annotated LRR motifs (xxLxLxx) are in light  
684 green. Black triangles represent the EMS-induced mutations within the protein sequence. The  
685 plot shows the degree of amino acid conservation (50 amino acid rolling average) between  
686 *Yr7* and *Yr5* proteins, based on the conservation diagram produced by Jalview (2.10.1) from  
687 the protein alignment. Regions that correspond to the conserved domains have matching  
688 colours. The amino acid changes between *Yr5* and *YrSP* are annotated in black on the *YrSP*  
689 protein. **b**, Five *Yr5/YrSP* haplotypes were identified in this study. Polymorphisms are  
690 highlighted across the protein sequence with orange vertical bars for polymorphisms shared  
691 by at least two haplotypes and blue vertical bars for polymorphisms that are unique to the

692 corresponding haplotype. Matching colours across protein structures illustrate 100%  
693 sequence conservation.

694 **Figure 3: BED domains from BED-NLRs and non-NLR proteins are distinct.**

695 **a**, Numbers of NLRs in the syntenic regions across grass genomes (see Supplementary Figure  
696 7), including BED-NLRs. **b**, WebLogo (<http://weblogo.berkeley.edu/logo.cgi>) diagram  
697 showing that the BED-I and BED-II domains are distinct, with only the highly conserved  
698 residues that define the BED domain (red bars) being conserved between the two types. **c**,  
699 Gene structure most commonly observed for BED-NLRs and BED-BED-NLRs within the  
700 *Yr7/Yr5/YrSP* syntenic interval. **d**, Neighbour-net analysis based on uncorrected *P* distances  
701 obtained from alignment of 153 BED domains including the 108 BED-containing proteins  
702 (including 25 NLRs) from RefSeq v1.0, BED domains from NLRs located in the syntenic  
703 region as defined in Supplementary Figure 7, and BED domains from Xa1 and ZBED from  
704 rice. BED-I and II clades are highlighted in purple and blue, respectively. BED domains from  
705 the syntenic regions not related to either of these types are in red. BED domains derived from  
706 non-NLR proteins are in black and BED domains from BED-NLRs outside the syntenic  
707 region are in grey. Seven BED domains from non-NLR proteins were close to BED domains  
708 from BED-NLRs. Supplementary Figure 9 includes individual labels.

709 **Supplementary Figure 1: Deployment of *Yr7* cultivars in the field is correlated with an**  
710 **increase in the prevalence of *Pst* isolates virulent on *Yr7* in the UK.**

711 Percentage of total harvested weight of wheat cultivar carrying *Yr7* (green) and the  
712 proportion of *Pst* isolates that are virulent to *Yr7* (orange) from 1990 to 2016 in the United  
713 Kingdom. See Supplementary Table 2 for a summary of the data.

714

715 **Supplementary Figure 2: Identification of candidate contigs for the *Yr* loci using**  
716 **MutRenSeq.**

717 View of RenSeq reads from the wild-type and EMS-derived mutants mapped to the best  
718 candidate contigs identified with MutantHunter for the three genes targeted in this study.  
719 From top to bottom: vertical black lines represent the *Yr* loci, coloured rectangles depict the  
720 motifs identified by NLR-Annotator (each motif is specific to a conserved NLR domain<sup>56</sup>),  
721 while read coverage (grey histograms) is indicated on the left, e.g. [0 - 149], and the line from  
722 which the reads are derived on the right, e.g. CadWT for Cadenza wild-type. Vertical bars  
723 represent the position of the SNPs identified between the reads and reference assembly – red  
724 shows C to T transitions and green G to A transitions. Black boxes highlight SNP for which  
725 the coverage was relatively low, but still higher than the 20x detection threshold. The top  
726 view shows the *Yr7* allele annotated from the Cadenza genome assembly before manual  
727 curation (Supplementary File 3). Vertical black lines illustrate the assembled candidate  
728 contigs and the one that was formerly *de novo* assembled from Cadenza RenSeq data, lacking  
729 the 5' region containing the BED domain and thus the Cad903 mutation. The middle view  
730 illustrates the *Yr5* locus annotated from the Lemhi-*Yr5* *de novo* assembly. The results are  
731 similar to those described above for *Yr7*. The full locus was *de novo* assembled. The bottom  
732 view illustrates the *YrSP* locus annotated from the AvocetS-*YrSP* *de novo* assembly with the  
733 four identified susceptible mutants all carrying a mutation in the candidate contig. The full  
734 locus was *de novo* assembled.

735

736 **Supplementary Figure 3: Candidate contigs identified by MutRenSeq are genetically**  
737 **linked to the *Yr* loci mapping interval.**

738 Schematic representation of chromosome 2B from Chinese Spring (RefSeq v1.0) with the  
739 positions of published markers linked to the *Yr* loci and surrounding closely linked markers  
740 that were used to define their physical position (orange rectangle). The chromosome is  
741 depicted as a close-up of the physical locus indicating the positions of KASP markers that  
742 were used for genetic mapping (horizontal bars, Supplementary Table 15). Blue colour refers

743 to *Yr7*, red to *Yr5*, and purple to *YrSP*. The black arrow points to the NLR cluster containing  
744 the best BLAST hits for *Yr7* and *Yr5/YrSP* on RefSeq v1.0. Coloured lines link the physical  
745 map to the corresponding genetic map for each targeted gene (see Methods). Genetic  
746 distances are expressed in centiMorgans (cM).

747

748 **Supplementary Figure 4: *Yr7*, *Yr5* and *YrSP* proteins do not encode for a Coiled-Coil**  
749 **domain in the N-terminus.**

750 Graphical outputs from the COILS prediction program in three sliding windows (14, 21,  
751 and 28 amino acid, shown in green, blue, and red, respectively) for *Yr5* and *Yr7* with or  
752 without the BED domain (left) and characterised canonical NLRs: Sr33<sup>21</sup>, Mla10<sup>20</sup>, Pm3<sup>22</sup>  
753 and RPS5<sup>57</sup>. The X axis shows the amino acid positions and the Y axis the probability of a  
754 coiled coil domain formation. There was no difference in the prediction between the two Yr  
755 proteins with or without their BED domain. The 14 amino acid sliding window is the least  
756 accurate according to the user manual, consistent with the additional peaks observed in Sr33,  
757 Mla10 and Pm3 that were not annotated as CC domains in the corresponding publications<sup>20-</sup>  
758 <sup>22</sup>. Thus, the peak at position 1,200 in *Yr5* is unlikely to represent a CC domain. We  
759 performed a BLASTP search with the N-terminal region of the *Yr5* and *Yr7* proteins (from  
760 Met to the first amino-acid encoding the NB-ARC) with or without the BED domain and the  
761 best hits were proteins predicted to encode BED-NLRs from *Aegilops tauschii*, *Triticum*  
762 *uratu* and *Oryza Sativa* (data not shown). Based on the COILS prediction and the BLAST  
763 search, we concluded that *Yr7* and *Yr5/YrSP* do not encode CC domains.

764

765 **Supplementary Figure 5: Pedigrees of selected Thatcher-derived cultivars and their *Yr7***  
766 **allelic status.**

767 Pedigree tree of Thatcher-derived cultivars where each circle represents a cultivar and the  
768 size of the circle is proportional to its prevalence in the tree. Colours illustrate the genotype  
769 with red showing the absence of *Yr7* and yellow its presence. Cultivars in grey were not  
770 tested or are intermediate crosses. *Yr7* originated from *Triticum durum* cv. Iumillo and was  
771 introgressed into hexaploid wheat through Thatcher (indicated by arrow). Each *Yr7* positive  
772 cultivar is related to a parent that was also positive for *Yr7*. Figure was generated using the  
773 Helium software<sup>45</sup> (v1.17).

774

775 **Supplementary Figure 6: Diagnostic genetic marker for *Yr5*.**

776

777 The *Yr5*-specific insertion was used to generate a PCR amplification product of 1,281 bp for  
778 *Yr5* or a shorter amplicon for the absence of the insertion in *YrSP*, Claire, and Paragon (507  
779 bp). *Yr5* positive lines include the *Yr5* spelt donor and *Yr5* near-isogenic lines AvocetS-*Yr5*  
780 and Lemhi-*Yr5*. *YrSP* donor Spaldings Prolific and *YrSP* near-isogenic lines AvocetS-*YrSP*  
781 carry the shorter alternate allele, similar to the Claire, Cadenza and Paragon alleles identified  
782 in Figure 2. Negative controls include AvocetS and H<sub>2</sub>O. Size marker is shown on the left.

783

784 **Supplementary Figure 7: Expansion of BED-NLRs in the Triticeae and presence of**  
785 **conserved BED-BED-NLRs across the syntenic region.**

786 Schematic representation of the physical loci containing *Yr7* and *Yr5/YrSP* homologs on  
787 RefSeq v1.0 and its syntenic regions. The syntenic region is flanked by conserved non-NLR  
788 genes (orange arrows). Black arrows represent canonical NLRs and purple/blue/red arrows  
789 represent different types of BED-NLRs based on their BED domain and their relationship  
790 identified in Figure 3 and Supplementary Figure 8. Black lines represent phylogenetically  
791 related single NLRs located between the two NLR clusters illustrated in Supplementary  
792 Figure 9. Details of genes are reported in Supplementary File 4.

793

794 **Supplementary Figure 8: The *Yr* loci are phylogenetically related to nearby NLRs on**  
795 **RefSeq v1.0 and their orthologs.**

796 Phylogenetic tree based on translated NB-ARC domains from NLR-Annotator. Node labels  
797 represent bootstrap values for 1,000 replicates. The tree was rooted at mid-point and  
798 visualized with Dendroscope v3.5.9. The colour pattern matches that of Figure 3 to highlight  
799 BED-NLRs with different BED domains.

800

801 **Supplementary Figure 9: Neighbour-net analysis network as shown in Figure 3 with**  
802 **identifiers.**

803 Neighbour-net analysis based on uncorrected *P* distances obtained from alignment of 153  
804 BED domains including the 108 BED-containing proteins (including 25 NLRs) from RefSeq  
805 v1.0, BED domains from NLRs located in the syntenic region as defined in Supplementary  
806 Figure 7, and BED domains from Xa1 and ZBED from rice. BED-I and II clades are  
807 highlighted in purple and blue, respectively. BED domains from the syntenic regions not  
808 related to either of these types are in red. BED domains derived from non-NLR proteins are  
809 in black and BED domains from BED-NLRs outside the syntenic region are in grey. Seven  
810 BED domains from non-NLR proteins were close to BED domains from BED-NLRs.

811

812 **Supplementary Figure 10: BED-NLRs and BED-containing proteins are not**  
813 **differentially expressed in yellow rust-infected susceptible and resistant cultivars.**

814 Heatmap representing the normalised read counts (Transcript Per Million, TPM) from the  
815 reanalysis of published RNAseq data<sup>29</sup> for all the BED-containing proteins, BED-NLRs and  
816 canonical NLRs located in the syntenic region annotated on RefSeq v1.0. Lack of expression  
817 is shown in white and expression levels increase from blue to red. Asterisks show cases  
818 where several gene models were overlapping with NLR loci identified with NLR Annotator.  
819 The colour pattern matches that of Figure 3 to highlight BED-NLRs with different BED  
820 domains. Orange labels show the expression of the canonical NLRs located within the  
821 syntenic interval. The seven non-NLR BED genes whose BED domain clustered with the  
822 ones from BED-NLR proteins in Figure 3 and Supplementary Figure 9 are indicated by black  
823 triangles.

824

825 **Supplementary Table 1: Summary of *Pst* isolates tested on *Yr5* differential lines from**  
826 **2004 to 2017 in different regions.**

827 Overall, >6,000 isolates from 44 countries displaying >200 different pathotypes were tested  
828 on *Yr5* materials and no virulence was recorded apart from one isolate from Australia, PST  
829 360 E137 A+<sup>14</sup>. Data were obtained from public databases and reports on yellow rust  
830 surveillance, whose references are recorded. It is important to note that we report here the  
831 number of identified pathotypes for a given region and database. Similar pathotypes could  
832 thus have been counted twice if identified in different regions.

833

834 **Supplementary Table 2: Harvested weight of known *Yr7* cultivars from 1990 to 2016 and**  
835 ***virYr7* prevalence among UK *Pst* isolates.**

836 Proportion of harvested *Yr7* wheat cultivars in the UK from 1990 to 2016. The prevalence of  
837 yellow rust isolates virulent to *Yr7* across this time period is shown in the top row. Original  
838 data from NIAB-TAG Seedstats journal (NIAB-TAG Network) and the UK Cereal Pathogen  
839 Virulence Survey (<http://www.niab.com/pages/id/316/UKCPVS>).

840

841 **Supplementary Table 3: Plant materials analysed for the present study with the**  
842 **different *Pst* isolates used for the pathology assays.**

843



844 **Supplementary Table 4: Plant material submitted for Resistance gene enrichment**  
845 **Sequencing (RenSeq).**

846 From left to right: Mutant line identifier, targeted gene, score when infected with *Pst*  
847 according to the Grassner and Straib scale, mutation position, coverage of the mutation (at  
848 least 99% of the reads supported the mutant base in the mutant reads), predicted effect of the  
849 mutation on the protein sequence, comments. Lines with the same mutations are highlighted  
850 with matching colours.

851

852 **Supplementary Table 5: Genome assemblies used in the present study.**

853 Summary of the available genome assemblies<sup>58,59</sup> that were used for the *in silico* allele  
854 mining and synteny analysis across rice, *Brachypodium*, barley and different Triticeae  
855 accessions.

856

857 **Supplementary Table 6: *In silico* allele mining for *Yr7* and *Yr5/YrSP* in available**  
858 **genome assemblies for wheat.**

859 Table presents the percentage identity (% ID) of the identified alleles and matching colours  
860 illustrate identical haplotypes. Investigated genome assemblies are shown in Supplementary  
861 Table 5.

862

863 **Supplementary Table 7: Polymorphisms between *Yr5* protein and its identified alleles.**

864 Positions of the polymorphic amino acids across the five *Yr5/YrSP* proteins. Polymorphisms  
865 falling into the BED and NB-ARC domains are shown in red and blue, respectively.

866

867 **Supplementary Table 8: Presence/absence of *Yr7* alleles in a selected panel of Cadenza-**  
868 **derivatives and associated responses to different *Pst* isolates (avirulent to *Yr7*: *Pst***  
869 **15/151 and 08/21; virulent to *Yr7*: 14/106).**

870 Infection types were grouped into two categories: 1 for resistant and 2 for susceptible. We  
871 used Vuka as a positive control for inoculation and absence of *Yr7*. The typical response of a  
872 *Yr7* carrier would thus be 1 – 1 – 2, although some cultivars might carry other resistance  
873 genes that can lead to a 1 – 1 – 1 profile (e.g. Cadenza). Cultivars that were positive for *Yr7*  
874 had either one or the other profile so none of them was susceptible to a *Pst* isolate that is  
875 avirulent to *Yr7*. Few cultivars (e.g Bennington, KWS-Kerrin, Brando) were susceptible to  
876 one of the two isolates avirulent to *Yr7* in addition to their susceptibility to the *Yr7*-virulent  
877 isolate. However, none of them carried the *Yr7* allele.

878

879 **Supplementary Table 9: Presence/absence of *Yr7* and *YrSP* in different wheat**

880 **collections.** We used Vuka, AvocetS and Solstice as negative controls for the presence of *Yr7*  
881 and *YrSP* and AvocetS-*Yr* near-isogenic lines as controls for the corresponding *Yr* gene. We  
882 genotyped different collections: (i) a set of potential *Yr7* carriers based on literature research,  
883 (ii) a set of cultivars that belonged to the UK AHDB Recommended List  
884 (<https://cereals.ahdb.org.uk/varieties/ahdb-recommended-lists.aspx>) between 2005 and 2018  
885 (labelled 2005-2018-UK\_RL), (iii) the Gediflux collection that includes modern European  
886 bread wheat cultivars (1920-2010)<sup>25</sup>, (iv) a core set of the Watkins collection, which  
887 represent a set of global bread wheat landraces collected in the 1920-30s<sup>24</sup>. Most of the  
888 putative *Yr7* carriers were positive for all the *Yr7* markers apart from Aztec, Chablis and  
889 Cranbrook. Chablis was susceptible to the *Pst* isolates that were avirulent to *Yr7* so it  
890 probably does not carry the gene. Regarding the 2005-2018-UK\_RL results were consistent  
891 across already tested cultivars: Cadenza, Cordiale, Cubanita, Grafton and Skyfall were  
892 already positive in Supplementary Table 8. Energise, Freiston, Gallant, Oakley and  
893 Revelation were negative on both panels as well. Results were thus consistent across different  
894 sources of DNA. *Yr7*-containing cultivars are not prevalent in the 2005-2018 Recommended  
895 List set, however, this gene is present in Skyfall, which is currently one of the most harvested  
896 cultivars in the UK (Supplementary Table 2). We tested the *YrSP* marker on this set and it  
897 was positive only for AvocetS-*YrSP*. The frequency of *Yr7* was relatively low in the Gediflux  
898 panel (4%). This is consistent with results in Supplementary Table 2: *Yr7* deployment started  
899 in the UK in 1992 with Cadenza and it was rarely used prior to that date. The same was  
900 observed in the subset of the Watkins collection (10%) where landraces that were positive for  
901 *Yr7* all originated from India and the Mediterranean basin. *Yr7* was introgressed into  
902 Thatcher (released in 1936) from Iumillo, which originated from Spain and North-Africa  
903 (Genetic Resources Information System for Wheat and Triticum -  
904 <http://www.wheatpedigree.net/>). Iumillo is likely to be pre-1920s and these landraces are all  
905 bread wheats so they might have inherited it from another source. However, there is no  
906 evidence for *Yr7* coming from another source than Iumillo in the modern bread wheat  
907 cultivars.

908

909 **Supplementary Table 10: Presence/absence of *Yr5* alleles in selected cultivars.**

910 A subset of the aforementioned collection was investigated for the *Yr5* presence. “Yes” in the  
911 *Yr5* column refers to amplification of the 1,281 bp amplicon with the *Yr5*-Insertion primers

912 (Supplementary Figure 6). “Yes” in the *Yr5* alternate alleles column refers to the  
913 amplification of the 507 bp amplicon that was identified for AvocetS-*YrSP*, Claire, Cadenza  
914 and Paragon in Supplementary Figure 6. “Yes” in the no amplification column refers to  
915 identification of a profile similar to the one found for AvocetS in Supplementary Figure 6.

916

917 **Supplementary Table 11: Identified BED-containing proteins in RefSeq v1.0 based on a**  
918 **hmmer scan analysis (see Methods).**

919 Several features are added: number of identified BED domains and the presence of other  
920 conserved domains present, the best BLAST hit from the non-redundant database of NCBI  
921 with its description and score, and whether the BED domain was related to BED domains  
922 from NLR proteins based on the neighbour network shown in Supplementary Figure 8.

923

924 **Supplementary Table 12: Transcripts per Million-normalised read counts from the re-**  
925 **analysis of published RNA-Seq data<sup>29</sup> and associated differential expression analysis**  
926 **performed with DESeq2.**

927

928 **Supplementary Table 13: Sequencing details of RenSeq data generated in this study.**

929

930 **Supplementary Table 14: *De novo* assemblies generated from the corresponding**  
931 **RenSeq data.**

932

933 **Supplementary Table 15: Primers designed to map and clone *Yr7*, *Yr5*, and *YrSP*.**

934 Note that KASP assays require the addition of the corresponding 5' -tails for the two KASP  
935 primers

936

937 **Supplementary Table 16: Diagnostic markers for *Yr7*, *Yr5*, and *YrSP*.**

938 Note that KASP assays require the addition of the corresponding 5' -tails for the two KASP  
939 primers.

940

941 **Supplementary Table 17: Passport data of tested *T. dicoccoides* accessions**

942

943 **Supplementary File 1: Annotation of the *Yr7* locus in Cadenza with exon/intron**  
944 **structure, positions of mutations and the position of primers for long-range PCR and**  
945 **nested PCRs that were carried out prior to Sanger sequencing (Supplementary Table**

946 **15)**. The file also includes the derived CDS and protein sequences with annotated conserved  
947 domains. Amino acids encoding the BED domain are shown in red and those encoding the  
948 NB-ARC domain are in blue. LRR repeats identified with NLR Annotator are highlighted in  
949 dark green and manually annotated LRR motifs xxLxLxx are underlined and in bold black.

950

951 **Supplementary File 2: Annotation of the *Yr5/YrSP* locus in Lemhi-*Yr5* and AvocetS-**  
952 ***YrSP*, respectively, with exon/intron structure, the position of mutations and the**  
953 **position of primers for long-range PCR and nested PCRs that were carried out prior to**  
954 **Sanger sequencing (Supplementary Table 15).** The derived CDS and protein sequences  
955 with annotated conserved domains are also shown. Amino acids encoding the BED domain  
956 are shown in red and those encoding the NB-ARC domain are in blue. LRR repeats identified  
957 with NLR Annotator are highlighted in dark green and manually annotated LRR motifs  
958 xxLxLxx are underlined and in bold black. Design of the *Yr5* PCR marker is shown at the  
959 end of the file with the insertion that is specific to *Yr5* when compared to *YrSP* and Claire.

960

961 **Supplementary File 3: Curation of the *Yr7* locus in the Cadenza genome assembly based**  
962 **on Sanger sequencing results.**

963 Comments show the position of the unknown bases (“N”) in the “Yr7\_with\_Ns” sequence.  
964 Curation based on Sanger sequencing data is shown in bold black in the “curated\_Yr7”  
965 sequence with the 39 bp insertion and 129 bp deletion. Allele mining for *Yr7* in the Paragon  
966 assembly showed that a similar assembly issue might have occurred for this cultivar (same  
967 annotation in the “Yr7\_Paragon\_with\_Ns” sequence). This is consistent with the fact that  
968 both assemblies were produced with the same pipeline (Supplementary Table 5). We used  
969 RenSeq data available for Paragon and performed an alignment as described for the  
970 MutRenSeq pipeline against Cadenza NLRs with the curated *Yr7* loci included. A screen  
971 capture of the mapping is shown. Only one SNP was identified (75% Cadenza, 25%  
972 Paragon). Across the six reads supporting the alternate base, four displayed several SNPs and  
973 mapped to an additional Cadenza NLR. This provides evidence for the presence of the  
974 identical gene in Paragon which is supported by phenotypic data.

975

976 **Supplementary File 4: Syntenic region across different grasses (Supplementary Table 5)**  
977 **and the NLR loci identified with NLR-Annotator.** See Methods for a detailed explanation  
978 of the analysis and Supplementary Figure 7 for an illustration.

979

980 **Supplementary File 5: Curated sequences of BED-NLRs from chromosome 2B and**  
981 **Ta\_2D7.** Exons are highlighted with different colours (yellow, green, blue, pink). Amino  
982 acids encoding the BED domain are shown in red and those encoding the NB-ARC domain  
983 are in blue. LRR repeats identified with NLR Annotator are highlighted in dark green and  
984 manually annotated LRR motifs xxLxLxx are underlined and in bold black.

a

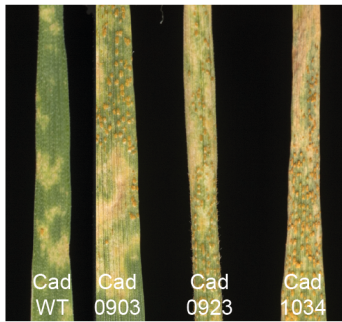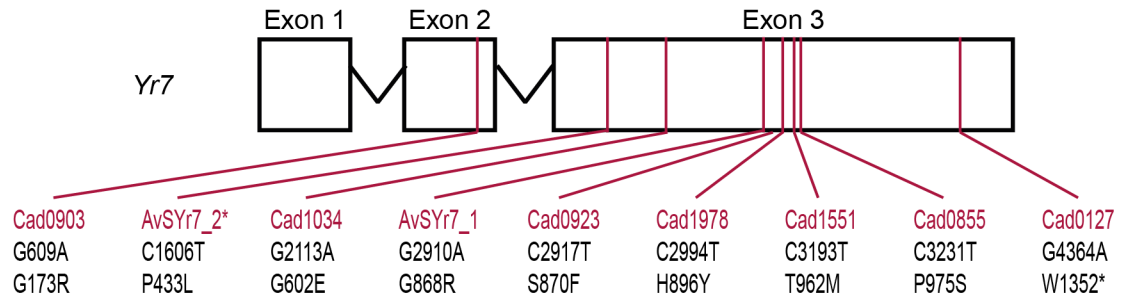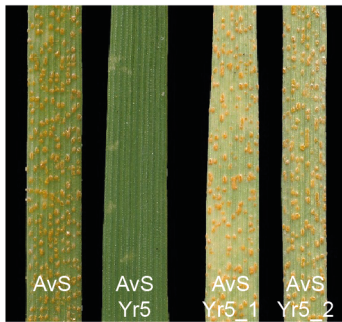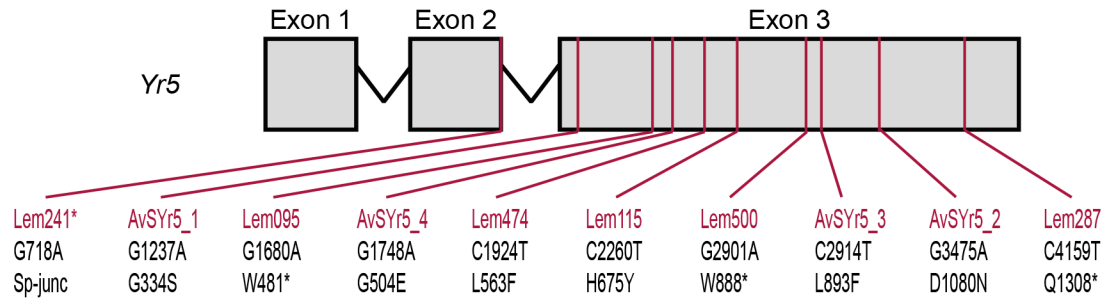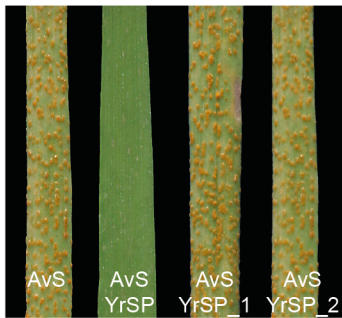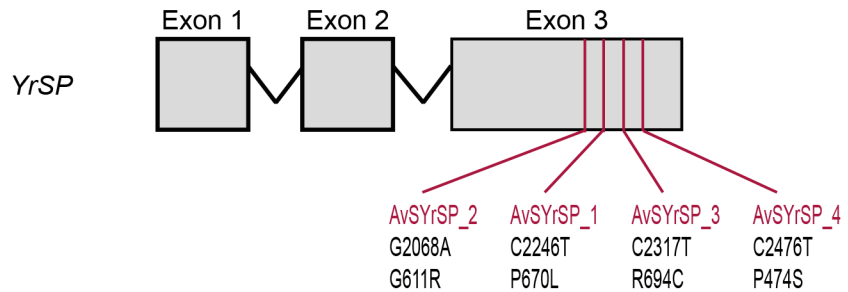

b

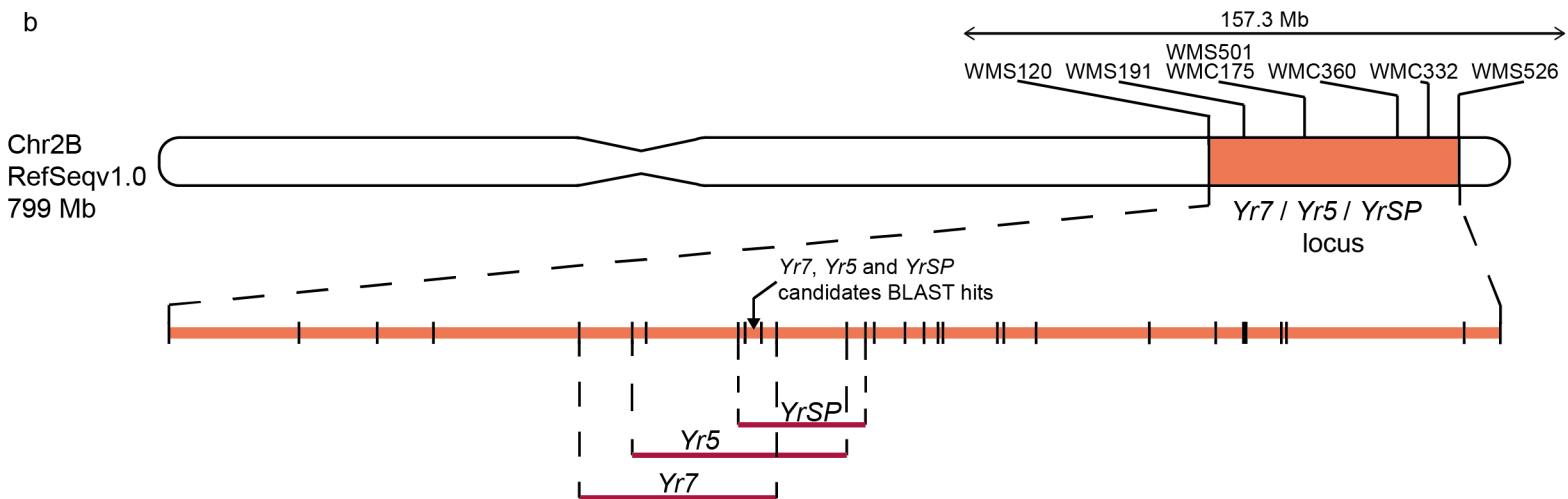

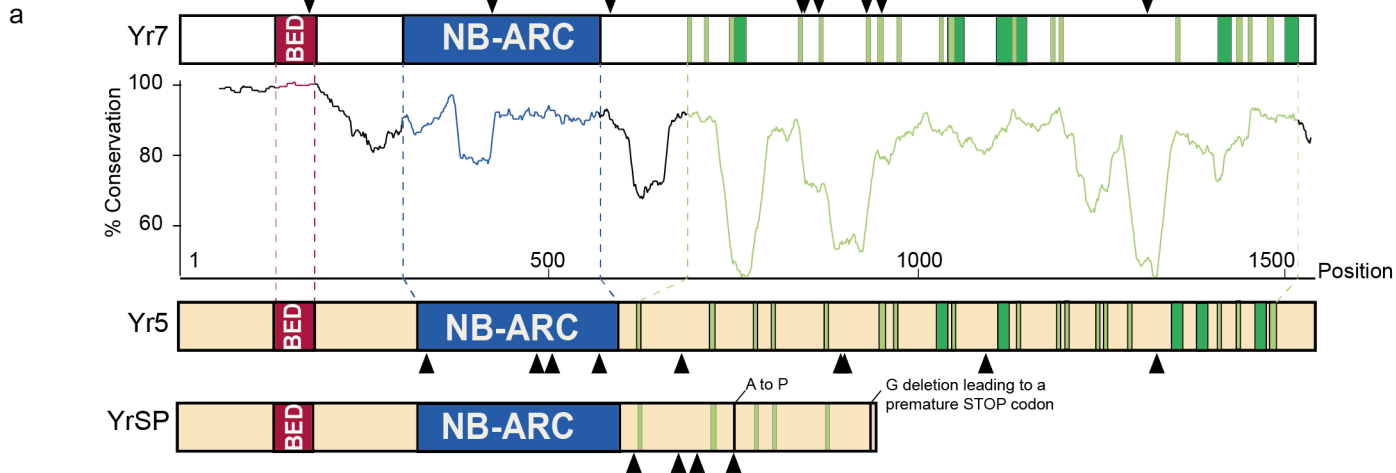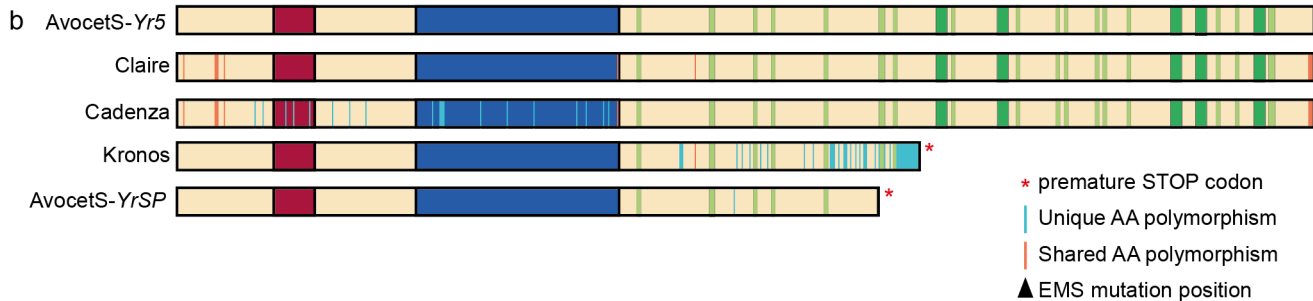



**a**

| Syntenic interval            | #NLRs | #BED |        |         |           |
|------------------------------|-------|------|--------|---------|-----------|
|                              |       | NLRs | NLRs-I | NLRs-II | NLRs-I-II |
| Rice                         | 6     | 2    | -      | -       | -         |
| Brachypodium                 | 4     | 4    | 1      | 1       | -         |
| Barley                       | 2     | -    | -      | -       | -         |
| <i>Aegilops tauschii</i> (D) | 8     | 4    | 1      | 1       | 1         |
| Hexaploid wheat (D)          | 6     | 2    | 1      | -       | 1         |
| Tetraploid wheat (A)         | 8     | 1    | 1      | -       | -         |
| Hexaploid wheat (A)          | 12    | 5    | 3      | 2       | -         |
| Tetraploid wheat (B)         | 20    | 10   | 6      | 2       | 1         |
| Hexaploid wheat (B)          | 13    | 5    | 1      | 1       | 3         |

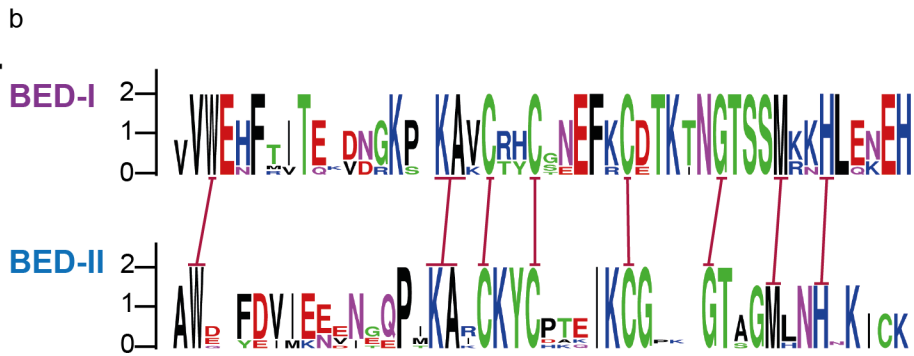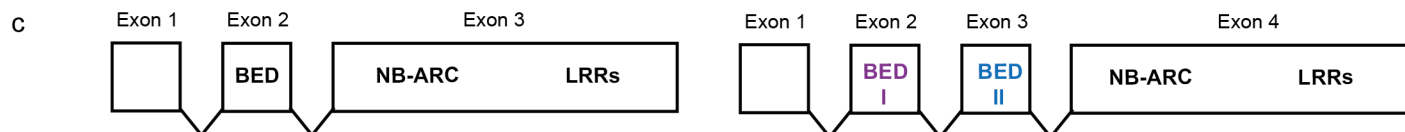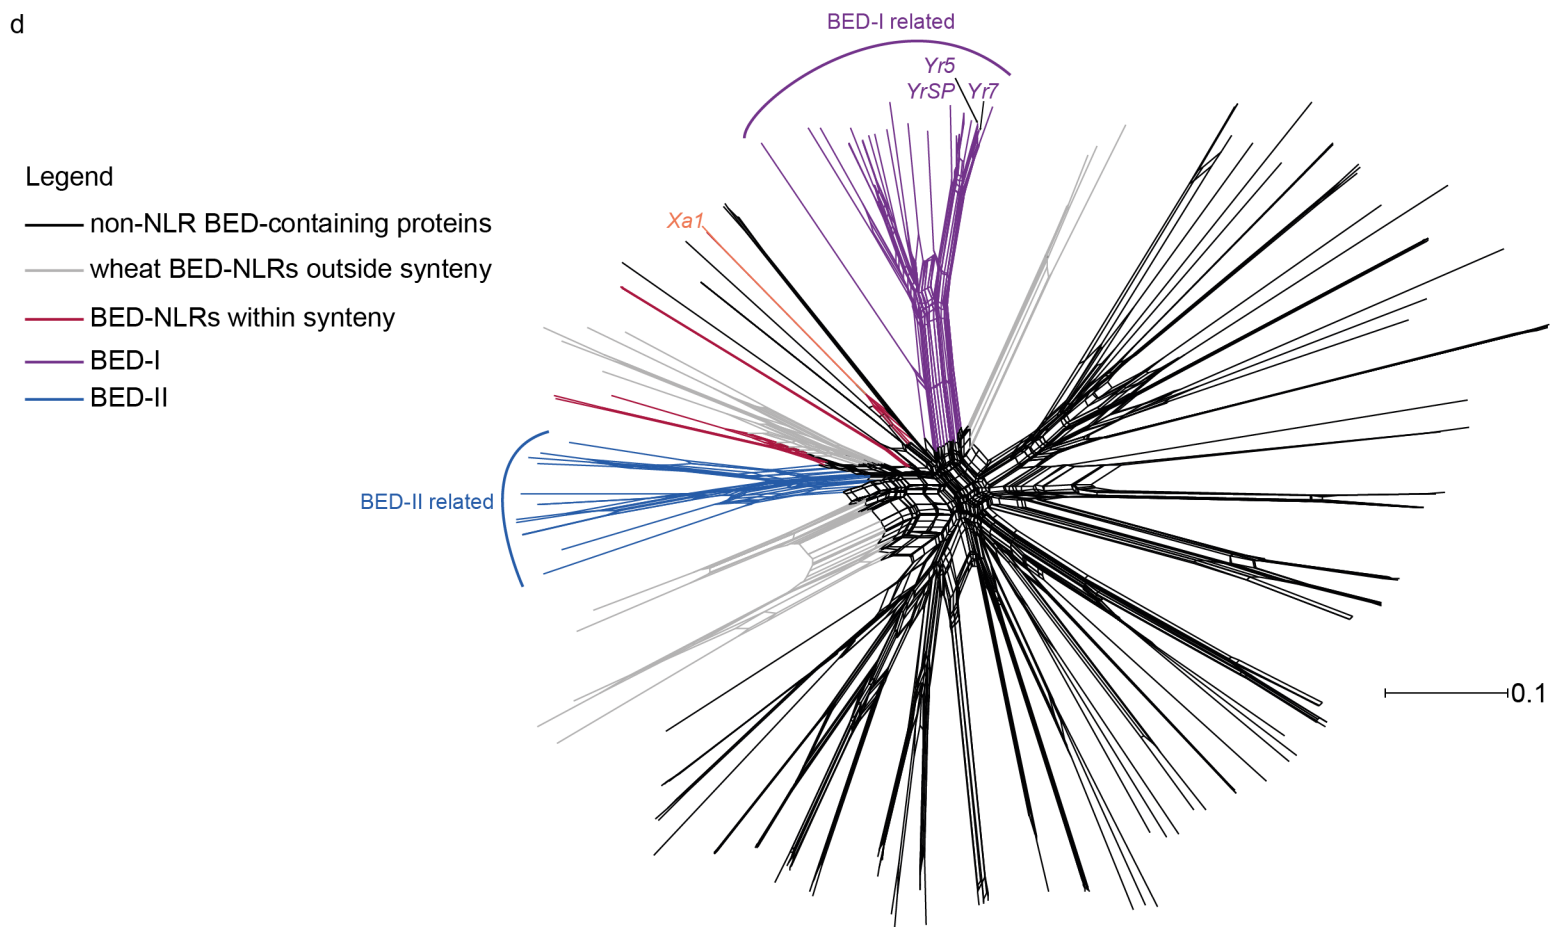

Source: https://www.biorxiv.org/content/10.1101/299651.full.pdf
